# Supplementary material for: Three-Dimensional Distribution of Biomass Burning Aerosols from Australian Wildfires Observed by TROPOMI Satellite Observations
Source: MDPI journal article supplement (doi:10.3390/rs14112582), 2022-05-27
Supplement: s1 [file s1]

Archive with 1 entries (1 files):
- remotesensing-1715179-supplementary.pdf
