# Supplementary material for: Three-Dimensional Distribution of Biomass Burning Aerosols from Australian Wildfires Observed by TROPOMI Satellite Observations
Source: MDPI journal article supplement (doi:10.3390/rs14112582), 2022-05-27
Supplement: s1 [file s1 › remotesensing-1715179-supplementary.pdf]

**Supplementary Materials:** The following are supporting information:

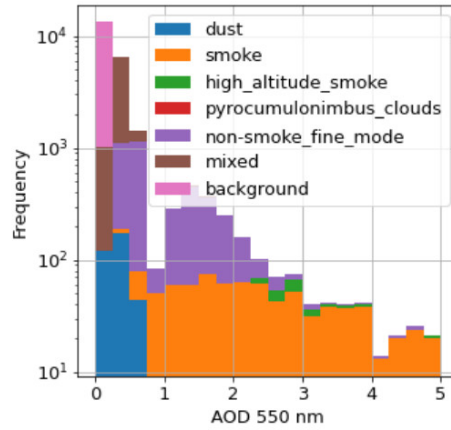

**Figure S1:** VIIRS AOD 550 nm per aerosol type from 20 to 24 December 2019;

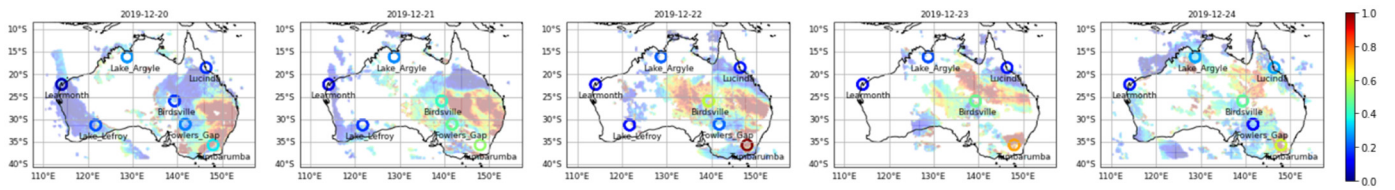

**Figure S2:** AEROS5P AOD 550 nm from 20 to 24 December 2019. Circles represent the AOD measured by ground-based sun photometer of AERONET stations.

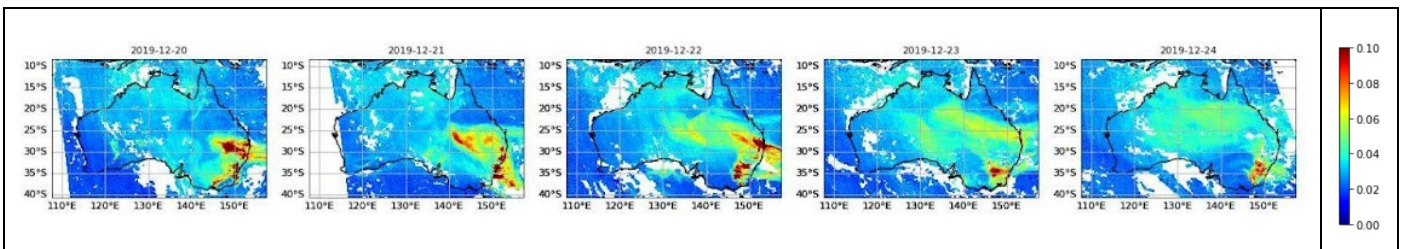

**Figure S3:** TROPOMI Carbon monoxide total column in  $10^{24}$  molec.m<sup>-2</sup> from 20 to 24 December 2019.

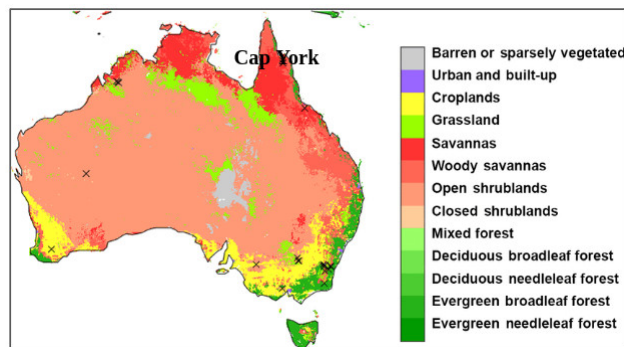

**Figure S4:** MCD12C1 land cover type map for Australia, from [75].
